# Supplementary material for: The production of polymer reference materials for microanalysis with high homogeneity by a 3D printing method
Source: Royal Society of Chemistry journal article supplement (doi:10.1039/d2ja00415a), 2023-01-01
Supplement: d2ja00415a1.pdf [file d2ja00415a1.pdf]

## **Electronic Supplementary Information**

### **The production of polymer reference materials for microanalysis with high homogeneity by 3D printing method**

Tianheng Gao, Tongxiang Ren<sup>\*</sup>, Yuanjing Zhou, Panshu Song, Song Wang

National Institute of Metrology (NIM), Beijing 100029, P. R. China

#### **Corresponding Author**

Tongxiang Ren,

National Institute of Metrology (NIM)

No.18, Beisanhuan Donglu, Chaoyang District,

Beijing, 100029, P.R. CHINA

Tel: +86-10-64524836

Email: rentx@nim.ac.cn

## Table of content

|          |                                                                                                        |
|----------|--------------------------------------------------------------------------------------------------------|
| Page S3  | <b>Figure S1.</b> 3D model and picture of printed samples.                                             |
| Page S4  | <b>Figure S2.</b> Signal intensity variation of C, P, Cr, Cd, Sn and Pb                                |
| Page S5  | <b>Figure S3.</b> Schematic diagram of the homogeneity evaluation.                                     |
| Page S6  | <b>Table S1.</b> Information to prepare the original solutions of Cr, Cd and Pb                        |
| Page S7  | <b>Table S2.</b> Optimized printing parameters for photocurable resin samples (with Chitubox software) |
| Page S8  | <b>Table S3.</b> Optimized parameters of the ICP-MS and LA-ICP-MS analysis                             |
| Page S9  | <b>Table S4.</b> Weights of the reagents to prepare the mixture and final mass concentration           |
| Page S10 | <b>Table S5.</b> Uncertainty evaluation of concentrations of Pb, Cd and Cr in the printed sample       |

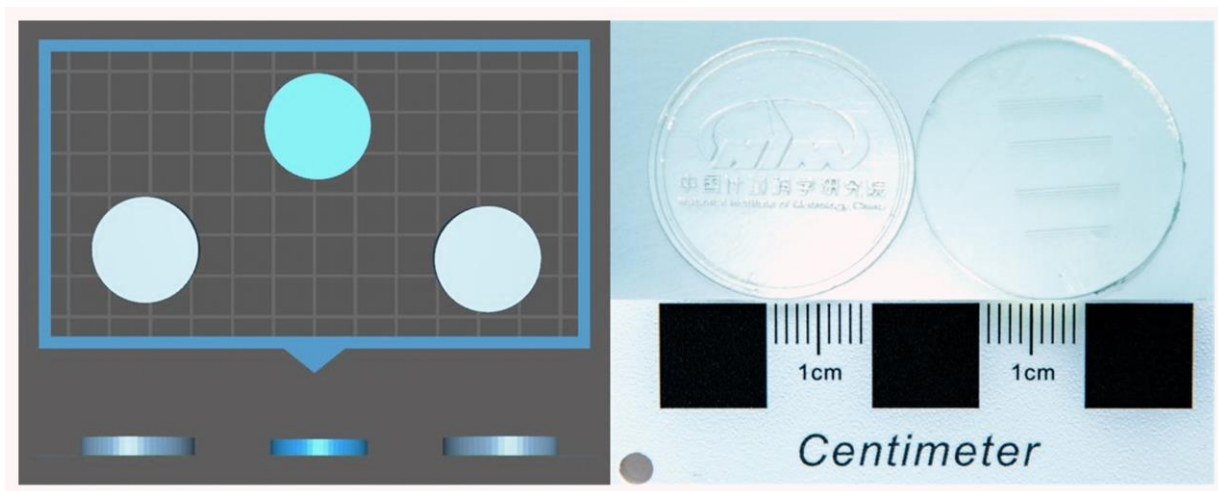

**Figure S1.** 3D model and picture of printed samples.

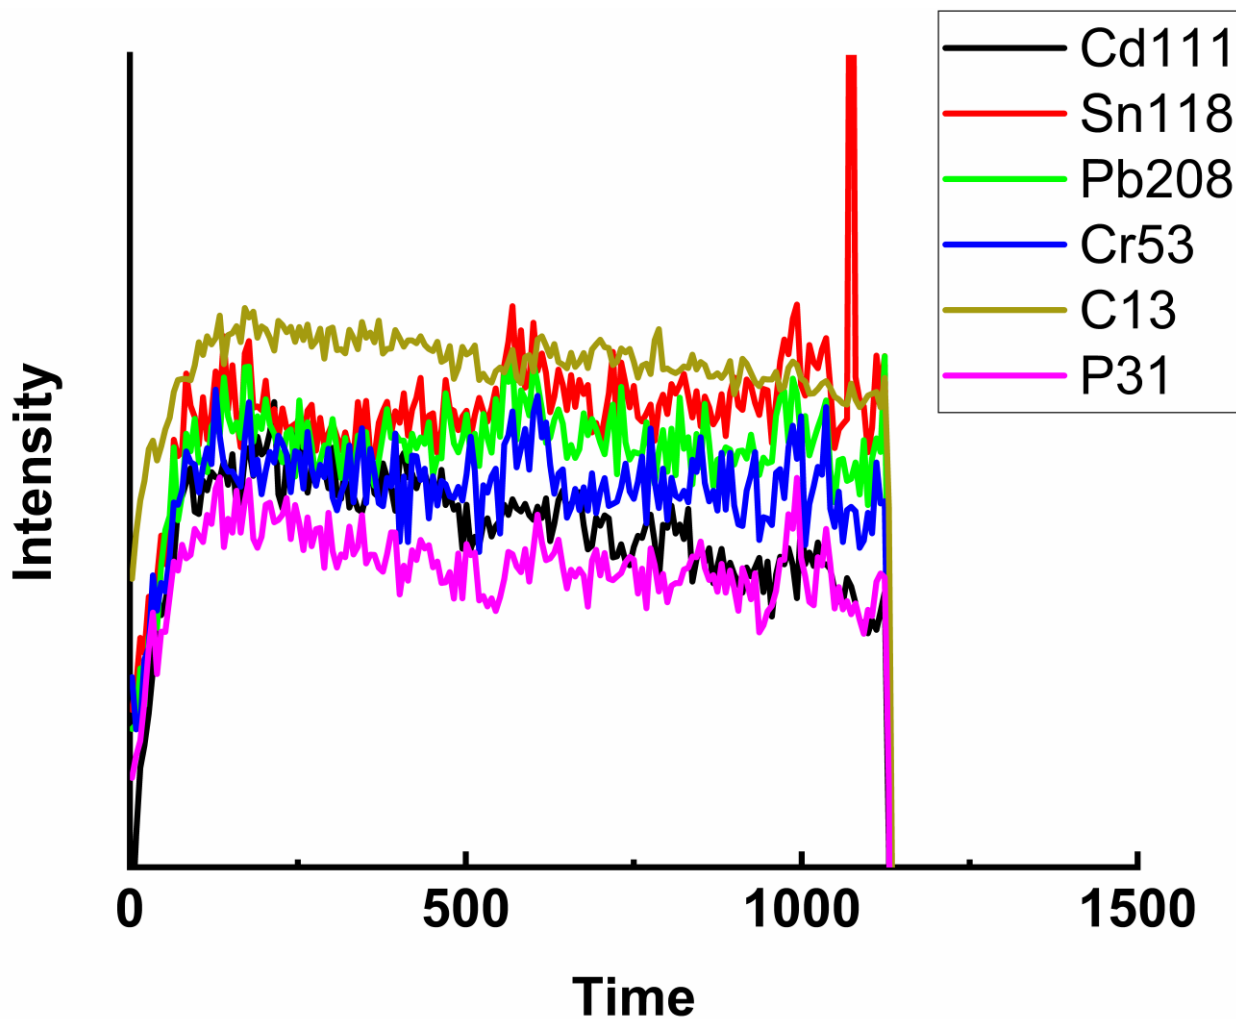

**Figure S2.** Typical signal fluctuations for C, P, Cr, Cd, Sn and Pb in the line scan mode with a 213 nm laser ablation system. Signal intensities were unified to  $5 \times 10^5$  counts per second (cps) to easily compare the differences between elements.

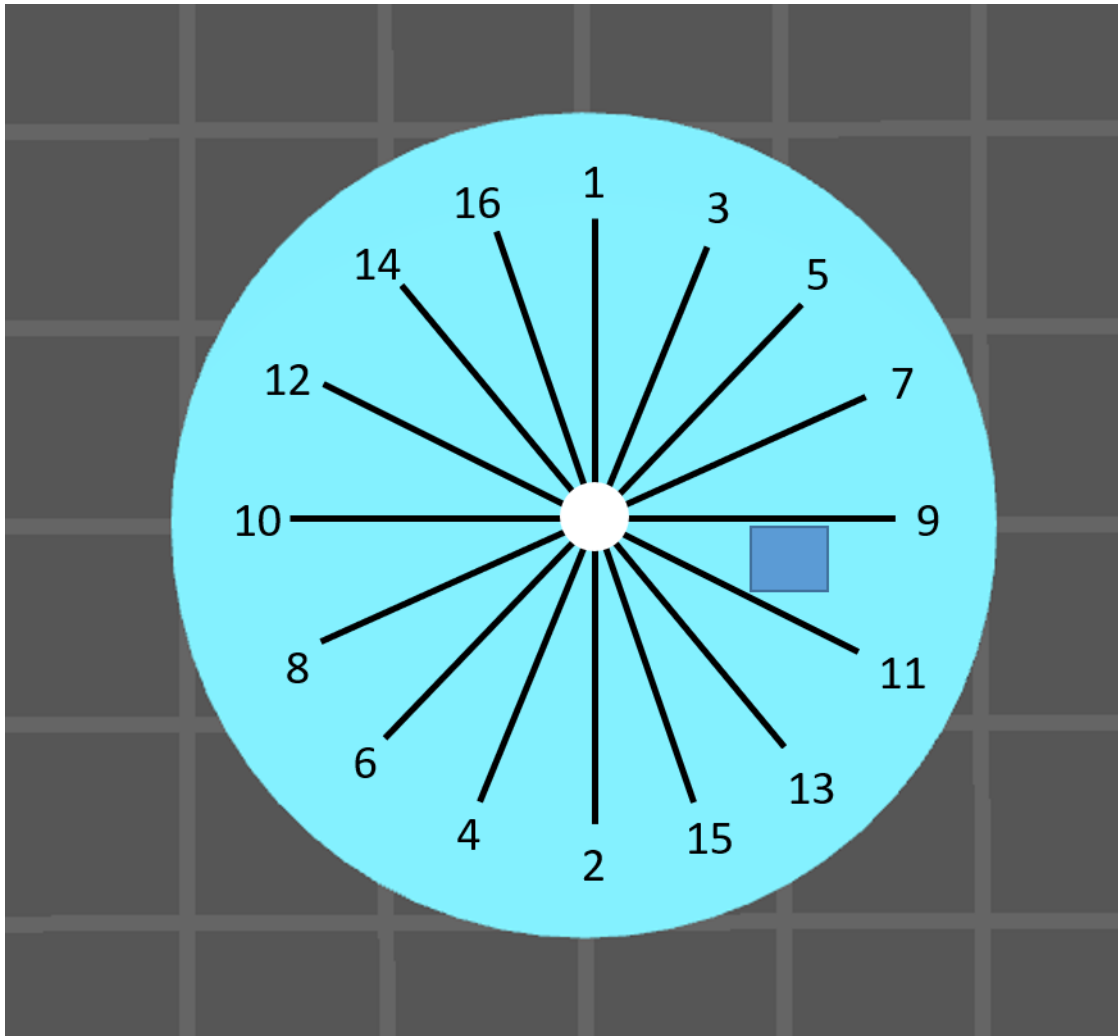

**Figure S3.** Schematic diagram of the homogeneity evaluation. Line scans are performed in the order of the serial numbers (1-16). The rectangle on the right shows the location of the smaller scale mapping analysis.

**Table S1. Information to prepare the original solutions of Cr, Cd and Pb**

| Element | Mass of the particles(g) | Acids                                                    | Mass of original solution(g) | Mass concentration (mg g <sup>-1</sup> ) (k =1) |
|---------|--------------------------|----------------------------------------------------------|------------------------------|-------------------------------------------------|
| Pb      | 1.9609(5)                | 5ml 2N HNO <sub>3</sub><br>+0.8ml 12N HNO <sub>3</sub>   | 24.4971(5)                   | 80.05(8)                                        |
| Cd      | 1.9418(5)                | 10ml 2N HNO <sub>3</sub><br>+1.25ml 12N HNO <sub>3</sub> | 24.2047(5)                   | 80.22(8)                                        |
| Cr      | 1.1712(5)                | 9ml 10.5M HCl                                            | 19.4226(5)                   | 60.29(6)                                        |

**Table S2. Optimized printing parameters for photocurable resin samples (with Chitubox software)**

---

| <b>3D printing related parameters</b>            |                                   |
|--------------------------------------------------|-----------------------------------|
| Machine Type                                     | PhrozenSonic Mini 4K              |
| Mirror                                           | LCD mirror                        |
| Layer Height                                     | 0.025 mm                          |
| Bottom Layer Count                               | 4 layers                          |
| Transition Layer Count                           | 0 layers                          |
| Bottom/Common single layer exposure time         | 50/35 s (50/20 for pure FLGPCL04) |
| Bottom/Common single layer light-off delay       | 0/0 s                             |
| Bottom/Common single layer lift distance         | 5/5 mm                            |
| Bottom/Common single layer lift speed            | 65/30 mm min <sup>-1</sup>        |
| Retract Speed                                    | 150 mm min <sup>-1</sup>          |
| Bottom/Common light Pulse Width Modulation (PWM) | 255/255                           |

---

**Table S3. Optimized parameters of the ICP-MS and LA-ICP-MS analysis**

| <b>ICP-MS</b>                             |                                                        |
|-------------------------------------------|--------------------------------------------------------|
| Nebulizer Gas Flow (L min <sup>-1</sup> ) | 1.06 (1.16 for LA)                                     |
| Auxiliary Gas Flow (L min <sup>-1</sup> ) | 1.2                                                    |
| Plasma Gas Flow (L min <sup>-1</sup> )    | 18                                                     |
| ICP RF Power (W)                          | 1450                                                   |
| Sweeps per reading                        | 30 (1 for LA)                                          |
| Reading per replicate                     | 1 (variable for LA)                                    |
| Replicate                                 | 6 (1 for LA)                                           |
| Integration interval (ms)                 | 150                                                    |
| Isotopes monitored                        | <sup>53</sup> Cr, <sup>111</sup> Cd, <sup>208</sup> Pb |
| <b>Laser ablation system (213nm)</b>      |                                                        |
| Scan Mode                                 | Line scan                                              |
| Spot Size (μm, Circle)                    | 100                                                    |
| Scan speed (μm s <sup>-1</sup> )          | 15                                                     |
| Repetition Rate (Hz)                      | 10                                                     |
| Energy setting                            | 100% (20.39J cm <sup>-2</sup> )                        |
| <b>Laser ablation system (193nm)</b>      |                                                        |
| Scan Mode                                 | Line scan                                              |
| Spot Size (μm, Circle)                    | 50                                                     |
| Scan speed (μm s <sup>-1</sup> )          | 30/15                                                  |
| Repetition Rate (Hz)                      | 20                                                     |
| Energy setting                            | 4 J cm <sup>-2</sup>                                   |



**Table S4. Weights of the reagents to prepare the mixture and final mass concentration ( $k=1$ )**

| Reagents                | Added weight (g) | Mass Concentration ( $\mu\text{g g}^{-1}$ ) |
|-------------------------|------------------|---------------------------------------------|
| PEGDA-575               | 51.569(5)        | /                                           |
| Original Solution of Pb | 0.1379(5)        | 107.3(2)                                    |
| Original Solution of Cd | 0.1200(5)        | 93.6(2)                                     |
| Original Solution of Cr | 0.1769(5)        | 103.7(2)                                    |
| FLGPCL04                | 50.847(5)        | /                                           |

**Table S5. Uncertainty evaluation of concentrations of Pb, Cd and Cr during ID-ICP-MS process in the printed sample.**

| <b>Pb</b>       |                 |                      |                          |        |
|-----------------|-----------------|----------------------|--------------------------|--------|
| Quantity        | Value           | Standard Uncertainty | Uncertainty Contribution |        |
| $M_x$           | 0.10444         | $289E^{-6}$          | -0.3                     | 12.40% |
| $C_y$           | 4.0099          | $8.08E^{-3}$         | 0.22                     | 6.60%  |
| $R_{Y206/207}$  | 0.015527        | $93.3E^{-6}$         | -0.16                    | 3.70%  |
| $R_{XY208/207}$ | 1.03347         | $3.57E^{-3}$         | 0.72                     | 73.60% |
| $C_x$ (Pb)      | 106.948         | 0.838                |                          | k=1    |
| <b>Cd</b>       |                 |                      |                          |        |
| Quantity        | Value           | Standard Uncertainty | Uncertainty Contribution |        |
| $M_x$           | 0.10083         | $289E^{-6}$          | -0.27                    | 12.10% |
| $C_y$           | 6.3017          | 0.0122               | 0.18                     | 5.50%  |
| $R_{Y113/111}$  | $4.60580E^{-3}$ | $8.81E^{-6}$         | 0.24                     | 9.50%  |
| $R_{X113/111}$  | 1.01663         | $1.38E^{-3}$         | -0.17                    | 4.80%  |
| $R_{XY113/111}$ | 0.31647         | $1.04E^{-3}$         | 0.45                     | 34.20% |
| $R_{YB113/111}$ | $4.6088E^{-3}$  | $13.9E^{-6}$         | -0.41                    | 29.00% |
| $C_x$ (Cd)      | 92.94           | 0.764                |                          | k=1    |
| <b>Cr</b>       |                 |                      |                          |        |
| Quantity        | Value           | Standard Uncertainty | Uncertainty Contribution |        |
| $R_{XY52/53}$   | 0.59231         | $3.45E^{-3}$         | 0.69                     | 18.40% |
| $M_x$           | 0.10739         | $289E^{-6}$          | -0.28                    | 3.00%  |
| $R_{Z52/53}$    | 8.6075          | 0.0811               | 0.22                     | 1.90%  |
| $R_{Z54/53}$    | 0.2679          | 0.0228               | -0.23                    | 2.00%  |
| $R_{N52/53}$    | 8.6194          | 0.0812               | 0.88                     | 30.30% |
| $R_{N54/53}$    | 0.2561          | 0.0218               | 0.23                     | 2.00%  |
| $R_{NB52/53}$   | 8.5539          | 0.0612               | -0.85                    | 27.90% |
| $R_{NB54/53}$   | 0.2463          | 0.021                | -0.22                    | 1.80%  |
| $R_{ZY52/53-1}$ | 0.51747         | $4.88E^{-3}$         | -0.19                    | 1.40%  |
| $R_{ZY52/53-2}$ | 0.49878         | $4.70E^{-3}$         | -0.18                    | 1.30%  |
| $R_{ZY52/53-3}$ | 0.4992          | $4.70E^{-3}$         | -0.19                    | 1.30%  |
| $R_{ZY52/53-4}$ | 0.49893         | $4.70E^{-3}$         | -0.19                    | 1.30%  |
| $R_{ZY52/53-5}$ | 0.49372         | $4.65E^{-3}$         | -0.19                    | 1.40%  |
| $R_{ZY52/53-6}$ | 0.49723         | $4.69E^{-3}$         | -0.19                    | 1.40%  |
| $C_x$ (Cr)      | 103.07          | 1.6                  |                          | k=1    |

Among them,  $R_Z$ ,  $R_N$ ,  $R_{NB}$ ,  $R_{XY}$ ,  $R_{ZY}$ ,  $C_y$  and  $M_x$  represent the ratio measurement results of known concentration standard, isotopic CRM, isotopic CRM in the resin matrix, sample + spike and six parallel concentration standard solution + spike, concentration of spike solutions and mass of printed samples, respectively.
